# Supplementary material for: Nutritional Profile of the Ethiopian Oilseed Crop Noug (Guizotia abyssinica Cass.): Opportunities for Its Improvement as a Source for Human Nutrition
Source: MDPI journal article supplement (doi:10.3390/foods10081778), 2021-07-31
Supplement: s1 [file s1]

Table S1. Mean mineral ( $\mu\text{g g}^{-1}$ ) and total nitrogen ( $\text{mg g}^{-1}$ ) contents of 36 noug genotypes grown at two locations (Ginchi and Holeta) in Ethiopia

| Genotype            | B  | Ca   | Cu | Fe   | K    | Mg   | Mn | Na | P     | S    | Se    | Zn | TN   |
|---------------------|----|------|----|------|------|------|----|----|-------|------|-------|----|------|
| NG-84 <sup>b</sup>  | 18 | 3839 | 18 | 350  | 7795 | 3792 | 42 | 45 | 9002  | 3099 | 0.022 | 45 | 46.1 |
| NG-86 <sup>a</sup>  | 18 | 3553 | 21 | 145  | 8154 | 3496 | 27 | 33 | 7812  | 3084 | 0.029 | 44 | 41.3 |
| NG-87 <sup>a</sup>  | 17 | 3744 | 19 | 368  | 8778 | 3652 | 41 | 28 | 9333  | 3269 | 0.027 | 46 | 43.4 |
| NG-90 <sup>a</sup>  | 19 | 3160 | 18 | 126  | 8481 | 3885 | 28 | 22 | 8950  | 3257 | 0.033 | 47 | 46.0 |
| NG-91 <sup>a</sup>  | 17 | 3542 | 17 | 179  | 7970 | 3477 | 25 | 19 | 8135  | 3133 | 0.018 | 44 | 44.9 |
| NG-92 <sup>b</sup>  | 17 | 3253 | 30 | 158  | 8383 | 4013 | 29 | 29 | 9259  | 3178 | 0.031 | 51 | 44.6 |
| NG-93 <sup>a</sup>  | 23 | 4036 | 36 | 1250 | 8524 | 3598 | 41 | 38 | 8432  | 2867 | 0.030 | 52 | 39.0 |
| NG-94 <sup>a</sup>  | 21 | 4602 | 20 | 164  | 8776 | 3480 | 26 | 22 | 8660  | 3077 | 0.034 | 43 | 42.8 |
| NG-95 <sup>a</sup>  | 24 | 3978 | 16 | 739  | 7096 | 3303 | 31 | 34 | 8766  | 2964 | 0.037 | 46 | 45.8 |
| NG-97 <sup>a</sup>  | 29 | 4116 | 22 | 358  | 8100 | 3592 | 38 | 28 | 8219  | 2997 | 0.031 | 49 | 39.3 |
| NG-98 <sup>a</sup>  | 22 | 3865 | 14 | 168  | 8955 | 3554 | 28 | 25 | 8943  | 3185 | 0.036 | 44 | 45.0 |
| NG-99 <sup>b</sup>  | 22 | 3939 | 16 | 203  | 9346 | 6849 | 25 | 29 | 9364  | 3113 | 0.034 | 51 | 46.0 |
| NG-101 <sup>b</sup> | 21 | 3780 | 18 | 171  | 9840 | 3897 | 30 | 26 | 9113  | 3160 | 0.035 | 52 | 43.6 |
| NG-102 <sup>a</sup> | 20 | 3691 | 18 | 167  | 9522 | 3750 | 29 | 25 | 9341  | 3267 | 0.027 | 53 | 45.7 |
| NG-103 <sup>a</sup> | 21 | 3638 | 19 | 241  | 9805 | 4322 | 34 | 28 | 10589 | 3269 | 0.026 | 51 | 48.6 |
| NG-105 <sup>a</sup> | 22 | 4263 | 16 | 159  | 8490 | 3569 | 34 | 30 | 8297  | 3313 | 0.035 | 46 | 48.6 |
| NG-106 <sup>a</sup> | 19 | 4222 | 16 | 329  | 8467 | 3641 | 36 | 28 | 9113  | 3137 | 0.040 | 46 | 42.7 |
| NG-107 <sup>b</sup> | 19 | 4311 | 15 | 221  | 9002 | 3226 | 29 | 26 | 8715  | 2927 | 0.017 | 41 | 46.9 |
| NG-108 <sup>a</sup> | 20 | 3871 | 15 | 120  | 8042 | 3664 | 33 | 35 | 9238  | 3218 | 0.041 | 43 | 46.0 |
| NG-109 <sup>a</sup> | 19 | 3335 | 15 | 406  | 8186 | 3692 | 40 | 26 | 9222  | 3302 | 0.036 | 45 | 44.0 |
| NG-111 <sup>b</sup> | 18 | 3774 | 18 | 375  | 7988 | 3607 | 32 | 36 | 8913  | 3115 | 0.043 | 48 | 41.5 |
| NG-112 <sup>a</sup> | 17 | 3349 | 15 | 123  | 9842 | 3748 | 36 | 35 | 9986  | 3370 | 0.083 | 44 | 46.9 |
| NG-113 <sup>a</sup> | 18 | 3384 | 15 | 122  | 8007 | 3768 | 32 | 23 | 9988  | 3134 | 0.033 | 46 | 45.4 |
| NG-114 <sup>b</sup> | 17 | 3642 | 15 | 127  | 7902 | 3815 | 31 | 22 | 9533  | 3152 | 0.032 | 47 | 46.7 |
| NG-117 <sup>b</sup> | 17 | 3703 | 21 | 275  | 9257 | 3633 | 32 | 33 | 9503  | 3076 | 0.036 | 50 | 45.1 |
| NG-118 <sup>a</sup> | 17 | 3677 | 16 | 127  | 8809 | 3554 | 28 | 26 | 9108  | 3304 | 0.044 | 46 | 44.3 |
| NG-120 <sup>a</sup> | 20 | 3460 | 18 | 158  | 8513 | 3542 | 35 | 31 | 9667  | 3009 | 0.033 | 45 | 48.8 |
| NG-121 <sup>a</sup> | 20 | 3718 | 25 | 320  | 8620 | 3671 | 35 | 44 | 9345  | 2968 | 0.031 | 47 | 41.7 |
| NG-123 <sup>a</sup> | 20 | 3409 | 25 | 144  | 7914 | 3782 | 29 | 30 | 9468  | 3066 | 0.032 | 48 | 46.5 |
| NG-124 <sup>b</sup> | 19 | 3480 | 23 | 160  | 8187 | 4031 | 30 | 31 | 10399 | 2989 | 0.031 | 52 | 43.5 |
| EVE <sup>c</sup>    | 19 | 3894 | 18 | 153  | 9323 | 3953 | 32 | 26 | 9820  | 3135 | 0.031 | 46 | 46.5 |
| FOG <sup>c</sup>    | 21 | 3752 | 21 | 287  | 9093 | 3908 | 29 | 35 | 9688  | 2980 | 0.033 | 45 | 43.3 |
| GIN <sup>c</sup>    | 19 | 3753 | 25 | 195  | 9036 | 3651 | 33 | 26 | 9052  | 2966 | 0.032 | 46 | 43.8 |
| KUY <sup>c</sup>    | 18 | 3537 | 18 | 156  | 9845 | 4090 | 37 | 34 | 9603  | 3266 | 0.053 | 42 | 44.4 |
| LVE <sup>c</sup>    | 20 | 3813 | 22 | 320  | 9598 | 3862 | 35 | 40 | 9653  | 3087 | 0.027 | 46 | 46.5 |
| SHA <sup>c</sup>    | 22 | 3782 | 18 | 432  | 9978 | 4231 | 37 | 37 | 10412 | 3126 | 0.033 | 46 | 47.4 |

<sup>a</sup> landrace population, <sup>b</sup> breeding population, <sup>c</sup> released cultivar. TN = Total nitrogen
